# Supplementary material
Source: Springer Nature journal article supplement (https://www.springermedizin.de/resource/supplementary/12950_2010_178_MOESM3_ESM.pdf/9558134)

Number of cells/mm<sup>3</sup>

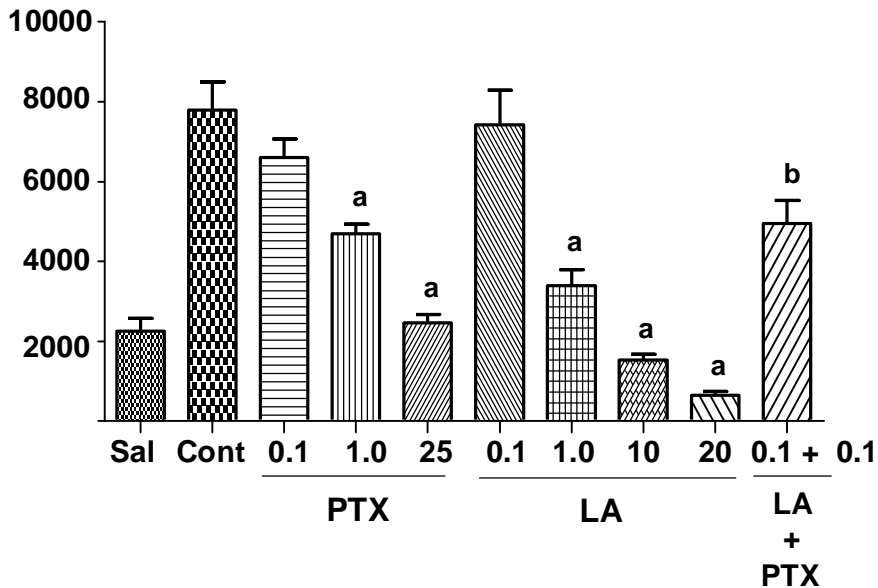

Supplement: MOESM3 [file 9558134]
